# Supplementary material
Source: MDPI journal article supplement (https://www.mdpi.com/2076-3263/12/10/371)

# Variable Response in Alpine Tree-Ring Stable Isotopes Following Volcanic Eruptions in the Tropics and Iceland

Tito Arosio <sup>1,2,3,\*</sup>, Stéphane Affolter <sup>4</sup>, Kurt Nicolussi <sup>5</sup>, Michael Sigl <sup>1,2</sup>, Malin Michelle Ziehmer-Wenz <sup>1,2,6</sup>, Christian Schlüchter <sup>2,7</sup>, Emmanuel Schaad <sup>1,2</sup>, Rafael Stähli <sup>1,2</sup> and Markus Christian Leuenberger <sup>1,2,\*</sup>

## SUPPLEMENTARY Materials

**Table S1. Parameter for the 34 volcanic eruptions**

| #  | Eruption Year | month | Source             | lat (°N) | Icelandic/<br>NHET &<br>tropical | Earlier Eruption | Later Eruption | Rank Global | Rank NH <sub>et</sub> |
|----|---------------|-------|--------------------|----------|----------------------------------|------------------|----------------|-------------|-----------------------|
| 1  | 1883          | 8     | Krakatao, 1883     | -6       | Tropical                         | 1875 (-8)        | 1890 (+7)      | 30          | 30                    |
| 2  | 1835          | 1     | Cosiguina, 1835    | 13       | Tropical                         | 1831 (-4)        | NA             | 29          | 43                    |
| 3  | 1831          | 1     | UE, 1831           | 19.5     | Tropical /<br>NHET               | 1823 (-8)        | 1835 (+4)      | 23          | 29                    |
| 4  | 1815          | 4     | Tambora, 1815      | -8       | Tropical                         | 1809 (-6)        | 1823 (+8)      | 5           | 8                     |
| 5  | 1809          | 1     | UE, 1809           | 0        | Tropical                         | NA               | 1815 (+6)      | 11          | 21                    |
| 6  | 1783          | 6     | Laki, 1783         | 64.4     | <b>Icelandic</b>                 | NA               | NA             | 14          | 3                     |
| 7  | 1729          | 1     | UE, 1729           | 45       | NHET                             | NA               | NA             | 41          | 25                    |
| 8  | 1695          | 1     | UE, 1695           | 0        | Tropical                         | 1693 (-2)        | NA             | 16          | 23                    |
| 9  | 1641          | 12    | Parker, 1641       | 6.1      | Tropical                         | 1637 (-4)        | 1646 (+5)      | 10          | 20                    |
| 10 | 1600          | 2     | Huaynaputina, 1600 | -16.6    | Tropical                         | 1595 (-5)        | NA             | 15          | 18                    |
| 11 | 1477          | 2     | Veidivötn, 1477    | 64.6     | <b>Icelandic</b>                 | 1471 (-6)        | 1480 (+3)      | 42          | 27                    |
| 12 | 1458          | 1     | UE, 1458           | 0        | Tropical                         | 1453 (-5)        | NA             | 2           | 12                    |
| 13 | 1453          | 1     | UE, 1453           | 0        | Tropical                         | NA               | 1458 (+6)      | 28          | 38                    |
| 14 | 1345          | 1     | UE, 1345           | 0        | Tropical                         | 1341 (-4)        | NA             | 17          | 24                    |
| 15 | 1286          | 1     | UE, 1286           | 0        | Tropical                         | NA               | NA             | 18          | 28                    |
| 16 | 1257          | 7     | Samalas, 1257      | -8.4     | Tropical                         | NA               | NA             | 1           | 1                     |
| 17 | 1230          | 1     | UE, 1230           | 0        | Tropical                         | NA               | NA             | 7           | 13                    |
| 18 | 1182          | 1     | Katla, 1182        | 63.6     | <b>Icelandic</b>                 | NA               | NA             | 25          | 9                     |
| 19 | 1171          | 1     | UE, 1171           | 0        | Tropical                         | NA               | NA             | 13          | 22                    |
| 20 | 1108          | 1     | UE, 1108           | 0        | Tropical                         | NA               | 1115 (+7)      | 12          | 19                    |
| 21 | 939           | 4     | Katla, 939         | 63.6     | <b>Icelandic</b>                 | NA               | 947 (+8)       | 22          | 5                     |
| 22 | 904           | 1     | UE, 904            | 45       | NHET                             | 900 (-4)         | NA             | 50          | 34                    |
| 23 | 822           | 1     | Katla, 822         | 63.6     | <b>Icelandic</b>                 | 817 (-6)         | 822 (+5)       | 49          | 33                    |
| 24 | 817           | 1     | UE, 817            | 45       | Tropical                         | NA               | NA             | 27          | 10                    |
| 25 | 750           | 1     | UE, 750            | 63.6     | <b>Icelandic</b>                 | NA               | 756 (+6)       | 31          | 16                    |
| 26 | 682           | 1     | UE, 682            | 0        | Tropical                         | NA               | 688 (+6)       | 4           | 11                    |
| 27 | 626           | 1     | UE, 626            |          | NHET                             | NA               | 632 (+6)       | 20          | 4                     |
| 28 | 574           | 1     | UE, 574            | 0        | Tropical                         | NA               | NA             | 6           | 15                    |
| 29 | 540           | 1     | UE, 540            | 0        | Tropical                         | 536 (-4)         | 547 (+7)       | 3           | 7                     |
| 30 | 536           | 1     | UE, 536            | 45       | NHET                             | NA               | 540 (+4)       | 9           | 2                     |
| 31 | 433           | 1     | UE, 433            | 0        | Tropical                         | NA               | NA             | 21          | 40                    |
| 32 | 266           | 1     | UE, 266            | 0        | Tropical                         | NA               | NA             | 8           | 14                    |
| 33 | 169           | 1     | UE, 169            | 0        | Tropical                         | NA               | NA             | 19          | 26                    |
| 34 | 87            | 1     | UE, 87             | 45       | NHET                             | NA               | NA             | 24          | 6                     |

**Table S1:** Parameter for the 34 volcanic eruptions used in the superimposed epoch analyses, based on Toohey & Sigl (2017)

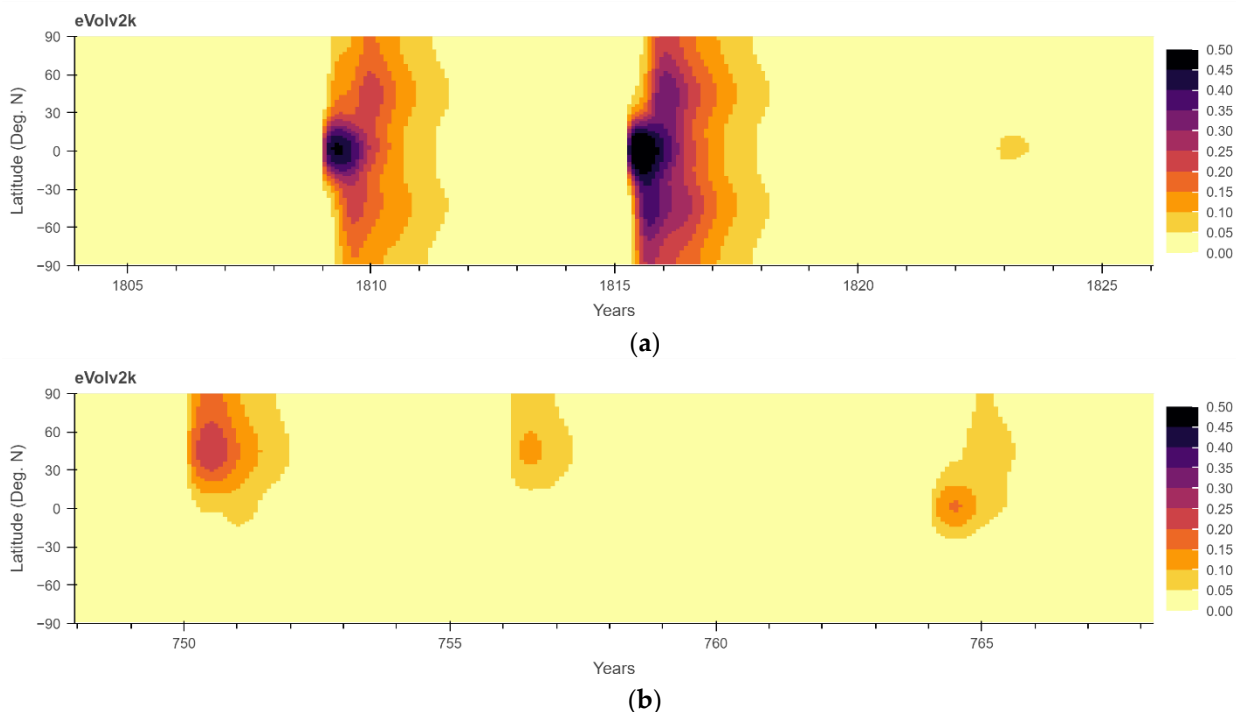

**Figure S1.** (a) Spatially and temporally resolved Stratospheric Aerosol Optical Depth (SAOD) reconstruction based on ice cores between 1804-1826 with volcanic eruptions in 1809 and 1815 (Toohey & Sigl 2017). (b) Spatially and temporally resolved SAOD reconstruction based on ice cores between CE 748-768 with volcanic eruptions in CE 750, 756 and 764 (Toohey & Sigl 2017).

## Figure S2

Timeline used for the correlation of fig 8. The values are shown in z-score to be compared.

in red the values of larch, green the value of cembran pine and blue the mean values in the three isorope. In black the values of the climatic variable a) temperature, b) precipitation, c) sunshine

The correlation of figure 8 considers the time window from 1850 to 1980 for precipitation and temperature. For sunshine was use the time windows 1870 – 1980.

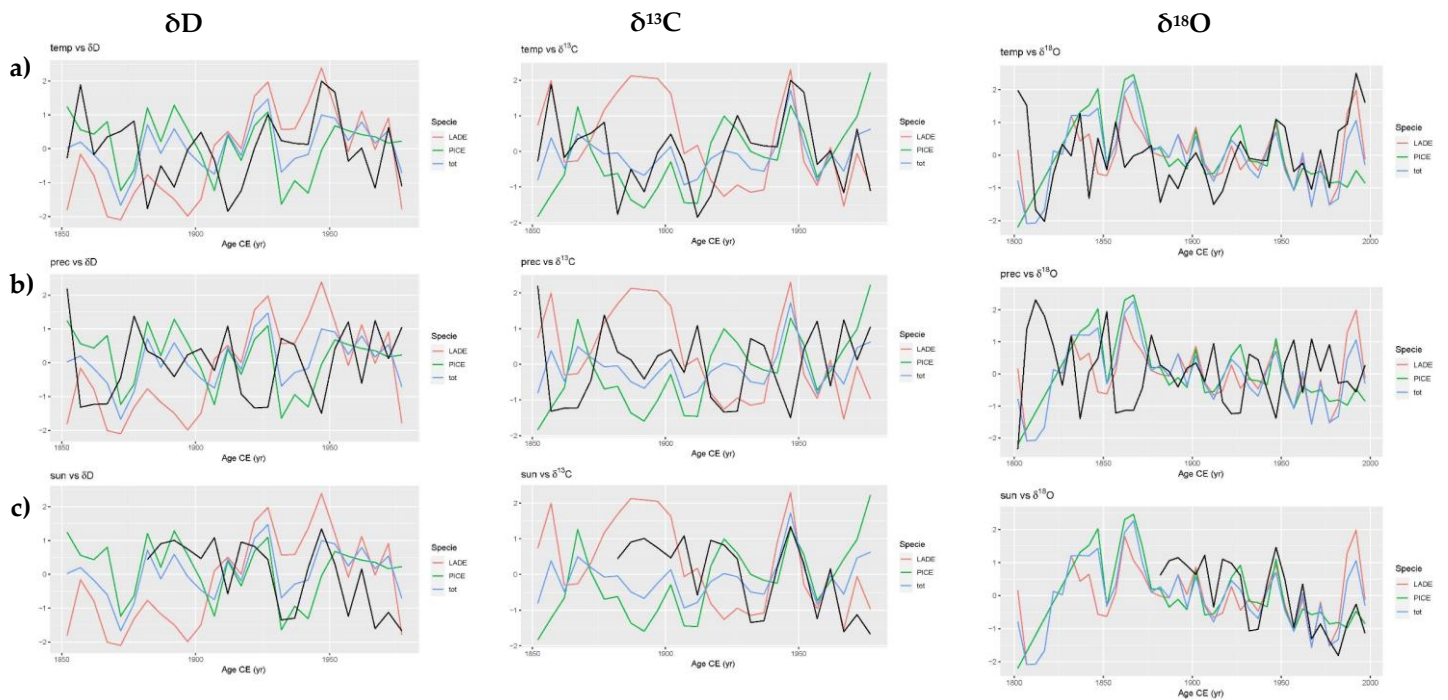

Supplement: s1 [file s1]
